# Supplementary material
Source: publisher figshare collection journal article supplement (https://sage.figshare.com/ndownloader/files/23882032)

## Supplemental Figure 1. Regression models comparing presence of medical conditions co-occurring with ASD diagnosis across the lifespan.

In this cohort, individuals with ASD were required to have at least two International Classification of Diseases, Ninth Revision (ICD-9) codes for ASD present in their record. Individuals with ASD were matched on age at first visit (within 6 months), age at last visit (within 24 months), and sex to a typical comparison group. (N, ASD=692, Typical Comparison=692). Here we report regression parameters for phecodes that were significant in the total lifespan cohort (as seen in **Figure 2** in the main text) and had sufficient data in this smaller cohort (Bonferroni corrected).

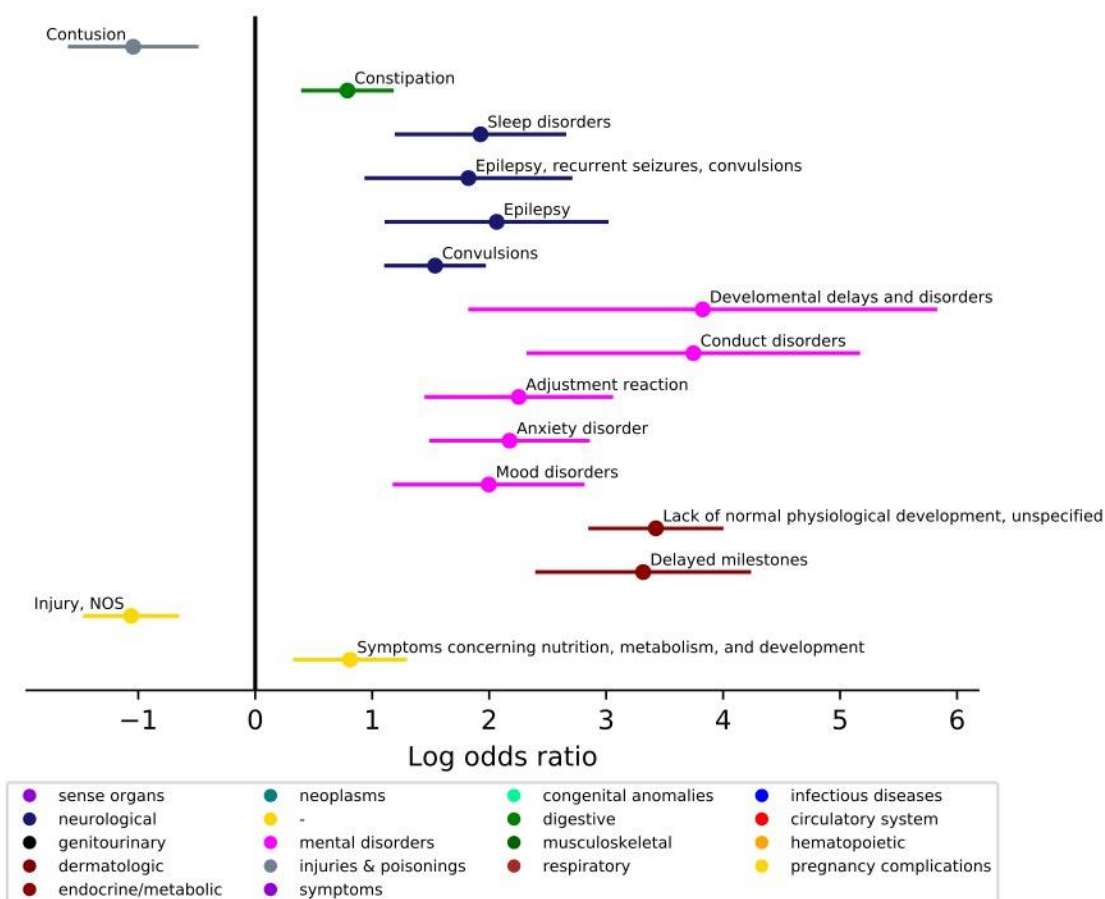

Supplement: Supplementary file 1 [file 23882032]
